# Supplementary material
Source: MDPI journal article supplement (https://www.mdpi.com/2304-6775/10/4/52)
Supplement: s1 [file s1]

## Supplementary Materials

### Appendix 1. Online Survey Questions

National and university library in Zagreb part of the survey related to barriers in conducting CS activities in cooperation of university and public libraries:

#### G. Public libraries

- Does your library carry out citizen science activities in cooperation with a public library?

Yes

No

If libraries choose “no”

- On a scale of 1–5, in which 1 means ‘strongly agree’ and 5 ‘completely disagree’, how would you rate the organization of citizen science activities in cooperation with the public library?

1      2      3      4      5

Lack of resources (staff, time, institutional funding)

Bad previous experiences in organizing joint events

Lack of experience in co-organizing events

Different work culture in higher education and public libraries

Administrative barriers

Financial barriers

Insufficient technical equipment

Lack of knowledge about citizen science

- Do you believe that it is possible to bypass these barriers with good organization

and cooperation?

Yes

No

- Do you think your library is well-connected with your local community?

Yes

No

- Are you considering cooperation with a public library in conducting Citizen Science

activities in the future?

Yes

No
